# Supplementary material for: DNA methylation markers for cancer risk prediction of vulvar intraepithelial neoplasia
Source: PubMed Central journal article supplement (PMC8048962; doi:10.1002/ijc.33459), 2021-01-19
Supplement: IJC-148-2481-s001.pdf [file IJC-148-2481-s001.pdf]

## **DNA methylation markers for cancer risk prediction of vulvar intraepithelial neoplasia**

Nikki B. Thuijs<sup>1</sup>, Johannes Berkhof<sup>2</sup>, Mjide Özer<sup>3</sup>, Sylvia Duin<sup>1</sup>, Annina P. van Splunter<sup>1</sup>, Barbara C. Snoek<sup>1</sup>, Daniëlle A.M. Heideman<sup>1</sup>, Marc van Beurden<sup>4</sup>, Renske D.M. Steenbergen<sup>1,\*</sup>, Maaïke C.G. Bleeker<sup>1,\*</sup>

### **Table of contents**

Supplementary Figure 1

Supplementary Figure 2

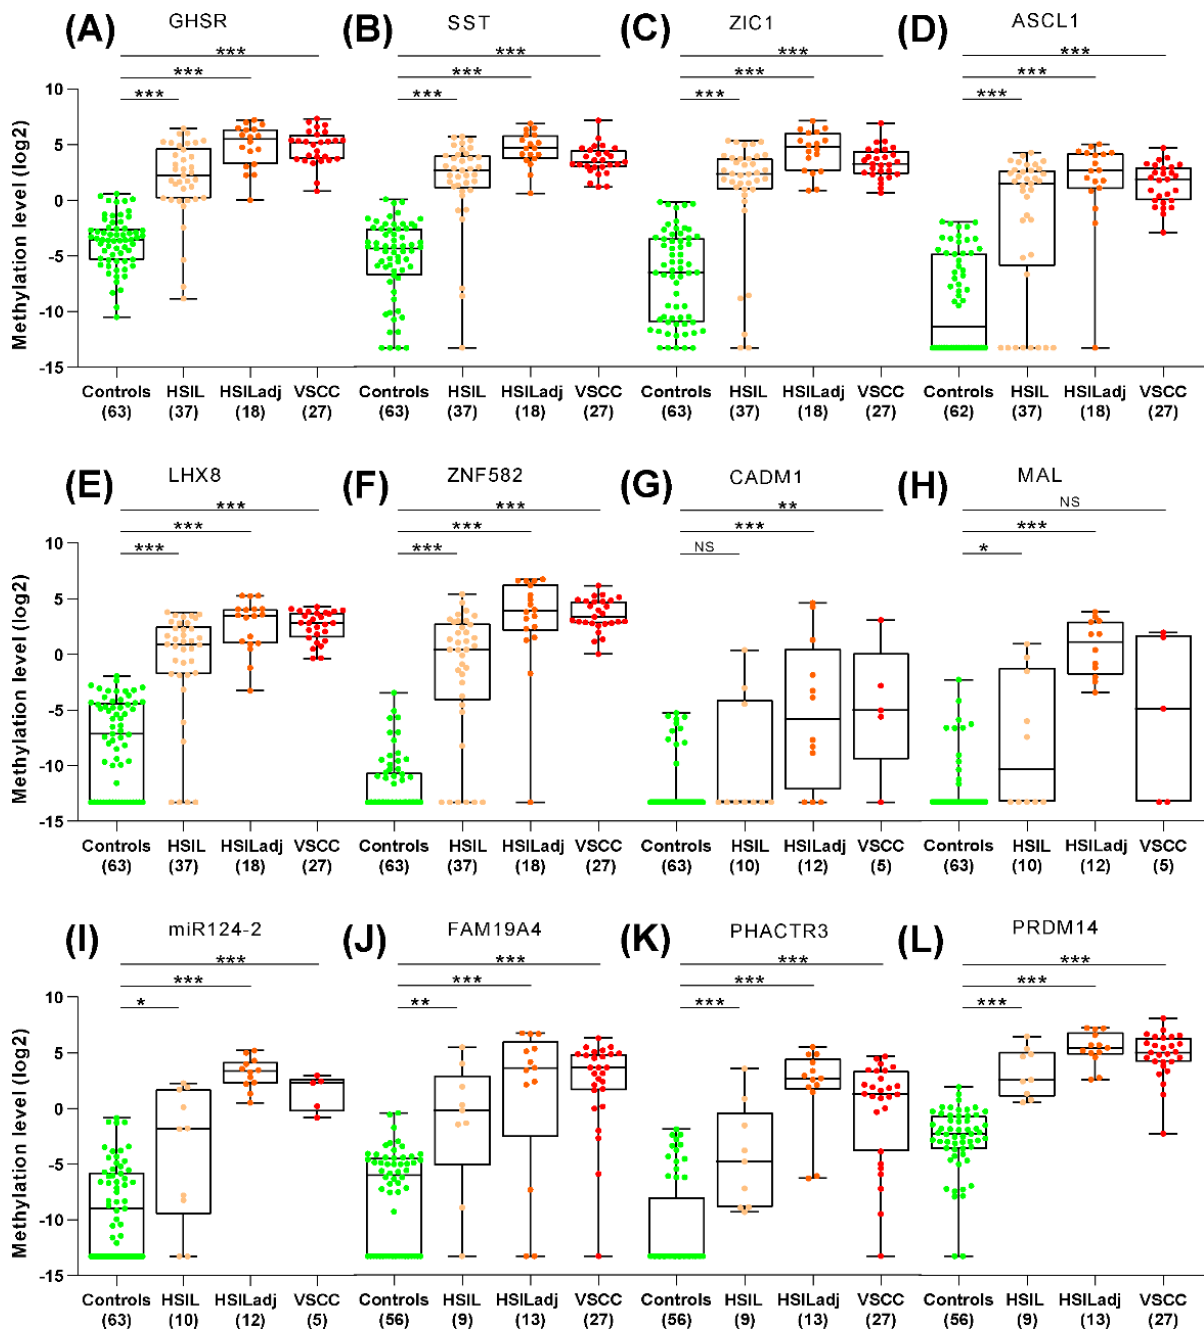

**Supplementary Figure 1.** DNA methylation levels shown relative to the reference gene *ACTB* (log<sub>2</sub>-transformed  $\Delta(\Delta)$ Ct ratios; y-axis) for HPV positive samples for the 4 disease categories (x-axis) for 12 markers: (A) GHSR, (B) SST, (C) ZIC1, (D) ASCL1, (E) LHX8, (F) ZNF582, (G) CADM1, (H) MAL, (I) miR124-2, (J) FAM19A4, (K) PHACTR3, and (L) PRDM14. Differences between histological categories upon Kruskal-Wallis test, followed by post hoc testing using the Mann-Whitney U test and Bonferroni multiple testing correction: \*p < .05 (marginal evidence), \*\*p < .01 (moderate evidence), \*\*\*p < .001 (strong evidence), NS: not significant. Abbreviations: HSIL = high-risk squamous intraepithelial lesion, HSILadj = HSIL adjacent to VSCC, VSCC = vulvar squamous cell carcinoma.

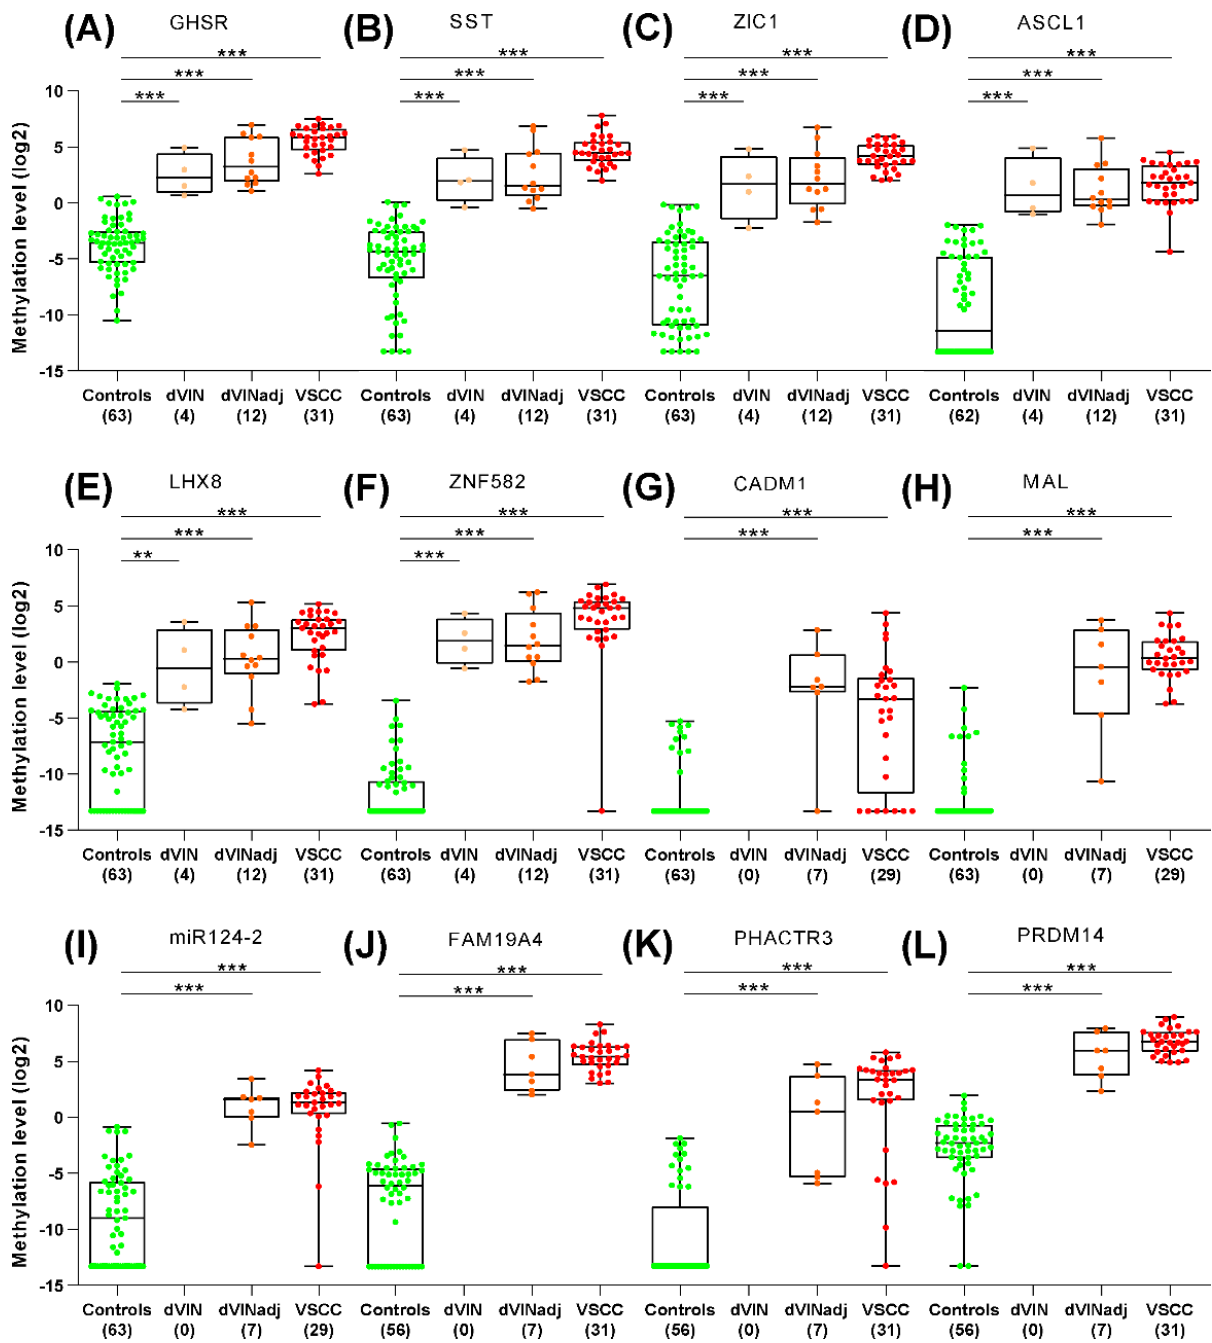

**Supplementary Figure 2.** DNA methylation levels shown relative to the reference gene *ACTB* (log<sub>2</sub>-transformed  $\Delta(\Delta)$ Ct ratios; y-axis) for HPV negative samples for the 4 disease categories (x-axis) for 12 markers: (A) GHSR, (B) SST, (C) ZIC1, (D) ASCL1, (E) LHX8, (F) ZNF582, (G) CADM1, (H) MAL, (I) miR124-2, (J) FAM19A4, (K) PHACTR3, and (L) PRDM14. Differences between histological categories upon Kruskal-Wallis test, followed by post hoc testing using the Mann-Whitney U test and Bonferroni multiple testing correction: \* $p < .05$  (marginal evidence), \*\* $p < .01$  (moderate evidence), \*\*\* $p < .001$  (strong evidence), NS: not significant. Abbreviations: dVIN = differentiated high-grade vulvar intraepithelial neoplasia, dVINadj = dVIN adjacent to VSCC, VSCC = vulvar squamous cell carcinoma.
